# Supplementary material for: Relative stability and reducibility of CeO2 and Rh/CeO2 species on the surface and in the cavities of γ-Al2O3: a periodic DFT study
Source: Royal Society of Chemistry journal article supplement (doi:10.1039/c5cp02547h), 2015-01-01
Supplement: c5cp02547h1.pdf [file c5cp02547h1.pdf]

## Electronic Supplementary Information

### Relative stability and reducibility of CeO<sub>2</sub> and Rh/CeO<sub>2</sub> species on the surface and in the cavities of $\gamma$ -Al<sub>2</sub>O<sub>3</sub>: A periodic DFT study

Iskra Z. Koleva,<sup>a</sup> Hristiyan A. Aleksandrov,<sup>a</sup> Georgi N. Vayssilov,<sup>a,\*</sup> Renata Duarte,<sup>b</sup> Jeroen A. van Bokhoven<sup>b,c,\*</sup>

<sup>a</sup> Faculty of Chemistry and Pharmacy, University of Sofia, 1126 Sofia, Bulgaria  
e-mail: gnv@chem.uni-sofia.bg

<sup>b</sup> Institute for Chemical and Bioengineering, ETH Zurich, Zurich, Switzerland

<sup>c</sup> Laboratory for Catalysis and Sustainable Chemistry, Swiss Light Source, Paul Scherrer Institute, Villigen, Switzerland, j.a.vanbokhoven@chem.ethz.ch

#### Content:

1. Table S1: Average displacement of Al and O ions of (100) and (001)  $\gamma$ -Al<sub>2</sub>O<sub>3</sub> slabs
2. Figure S1: Optimized structures of stoichiometric one ceria unit on  $\gamma$ -Al<sub>2</sub>O<sub>3</sub>(100).
3. Figure S2: Optimized structures of two ceria units and one Ce<sub>2</sub>O<sub>3</sub> deposited or inside cavities of  $\gamma$ -Al<sub>2</sub>O<sub>3</sub>(100).
4. Figure S3: Optimized structures of deposited ceria nanoparticle and incorporated in the bulk of  $\gamma$ -Al<sub>2</sub>O<sub>3</sub>(100) ceria species.
5. Figure S4: Optimized structures of deposited/incorporated stoichiometric or reduced ceria units on  $\gamma$ -Al<sub>2</sub>O<sub>3</sub>(001).
6. Figure S5: Optimized structures of deposited ceria nanoparticle and incorporated in the bulk of  $\gamma$ -Al<sub>2</sub>O<sub>3</sub>(001) ceria species.
7. Figure S6: Representation of Al and O ions from the slab with large displacement - equal to or above 1.2 Å (colored in black and yellow, respectively) in some structures with deposited or incorporated stoichiometric ceria species.
8. Description of the approach for simulation of the relative concentrations of reduced and stoichiometric ceria nanoparticles on  $\gamma$ -Al<sub>2</sub>O<sub>3</sub>(100) surface using enthalpy and entropy values obtained from computational results.
9. Discussion on interatomic distances in the different structures.

Color coding for all figures: Ce<sup>4+</sup> - green, Ce<sup>3+</sup> - cyan, O from CeO<sub>2</sub> species - orange, Al - gray, O - red, exchanged Al - dark blue.

**Table S1.** Comparison between the average displacement of all Al and O ions of  $\gamma$ -Al<sub>2</sub>O<sub>3</sub> and only for surface Al and O (in Å) in different structures with deposited or incorporated stoichiometric ceria species.

| Structure                                                   | Description                                                              | Al    | O     | Surface Al | Surface O |
|-------------------------------------------------------------|--------------------------------------------------------------------------|-------|-------|------------|-----------|
| <b><math>\gamma</math>-Al<sub>2</sub>O<sub>3</sub>(100)</b> |                                                                          |       |       |            |           |
| A-1a                                                        | CeO <sub>2</sub> deposited                                               | 0.317 | 0.318 | 0.487      | 0.389     |
| A-1b                                                        | CeO <sub>2</sub> in subsurface cavity                                    | 0.398 | 0.374 | 0.664      | 0.618     |
| A-1c                                                        | CeO <sub>2</sub> in internal cavity                                      | 0.461 | 0.448 | 0.840      | 0.869     |
| A-2a                                                        | 2CeO <sub>2</sub> deposited                                              | 0.314 | 0.321 | 0.516      | 0.541     |
| A-2c                                                        | 2CeO <sub>2</sub> in identical subsurface cavities                       | 0.512 | 0.514 | 0.937      | 1.034     |
| A-2e                                                        | 2CeO <sub>2</sub> internal cavities                                      | 0.568 | 0.590 | 0.792      | 0.891     |
| A-13a                                                       | Ce <sub>13</sub> O <sub>26</sub> deposited                               | 0.102 | 0.083 | 0.235      | 0.178     |
| A-13b                                                       | Ce <sub>12</sub> O <sub>24</sub> deposited, 1CeO <sub>2</sub> subsurface | 0.312 | 0.290 | 0.617      | 0.529     |
| A-13c                                                       | Ce <sub>11</sub> O <sub>22</sub> deposited, 2CeO <sub>2</sub> subsurface | 0.394 | 0.378 | 0.783      | 0.728     |
| <b><math>\gamma</math>-Al<sub>2</sub>O<sub>3</sub>(001)</b> |                                                                          |       |       |            |           |
| B-1a                                                        | CeO <sub>2</sub> deposited                                               | 0.023 | 0.021 | 0.004      | 0.006     |
| B-1b                                                        | CeO <sub>2</sub> subsurface cavity                                       | 0.122 | 0.098 | 0.473      | 0.393     |
| B-1c                                                        | CeO <sub>2</sub> internal cavity                                         | 0.139 | 0.132 | 0.132      | 0.140     |
| B-2a                                                        | 2CeO <sub>2</sub> deposited                                              | 0.040 | 0.033 | 0.010      | 0.011     |
| B-2b                                                        | 2CeO <sub>2</sub> in identical subsurface                                | 0.212 | 0.205 | 0.720      | 0.664     |
| B-4a                                                        | 4CeO <sub>2</sub> deposited                                              | 0.045 | 0.038 | 0.014      | 0.017     |
| B-4b                                                        | 3CeO <sub>2</sub> deposited, 1CeO <sub>2</sub> subsurface                | 0.108 | 0.139 | 0.053      | 0.053     |
| B-13a                                                       | Ce <sub>13</sub> O <sub>26</sub> deposited                               | 0.051 | 0.045 | 0.028      | 0.034     |
| B-13b                                                       | Ce <sub>12</sub> O <sub>24</sub> deposited, 1CeO <sub>2</sub> subsurface | 0.173 | 0.146 | 0.059      | 0.058     |

A-1a

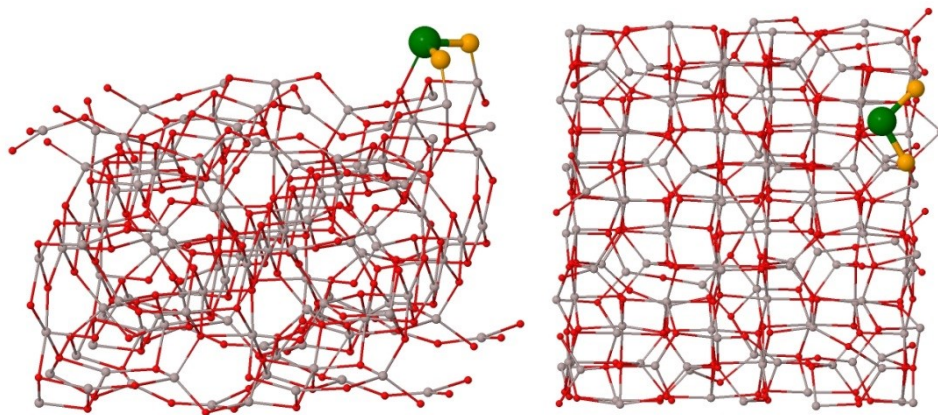

A-1b

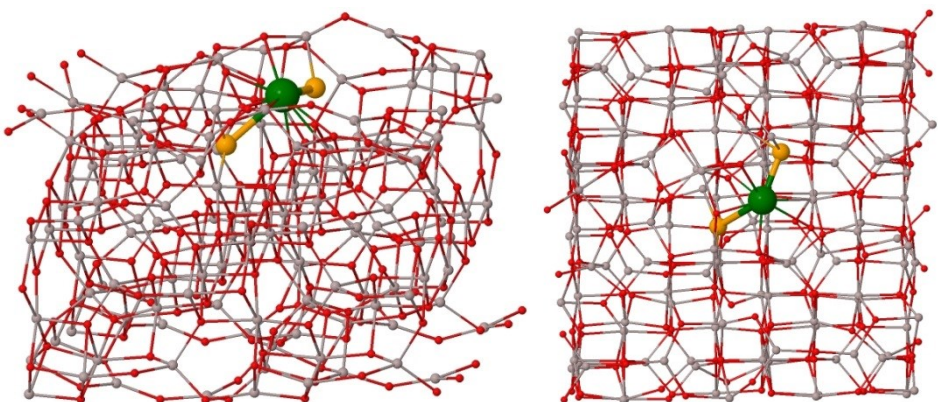

A-1c

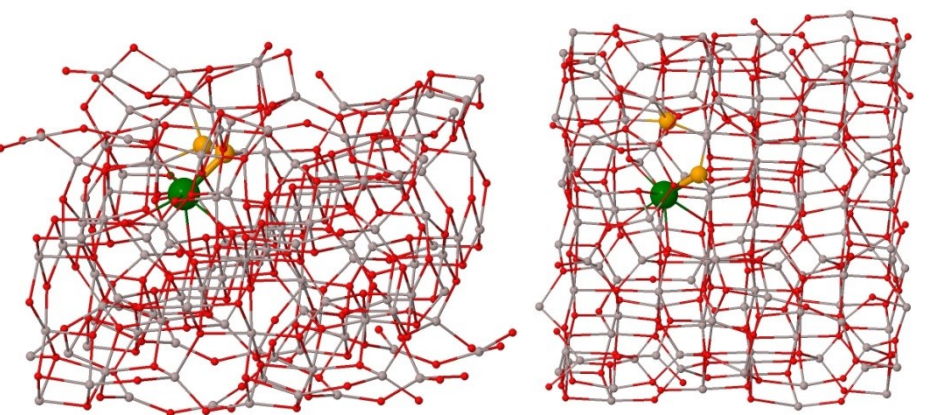

A-1d

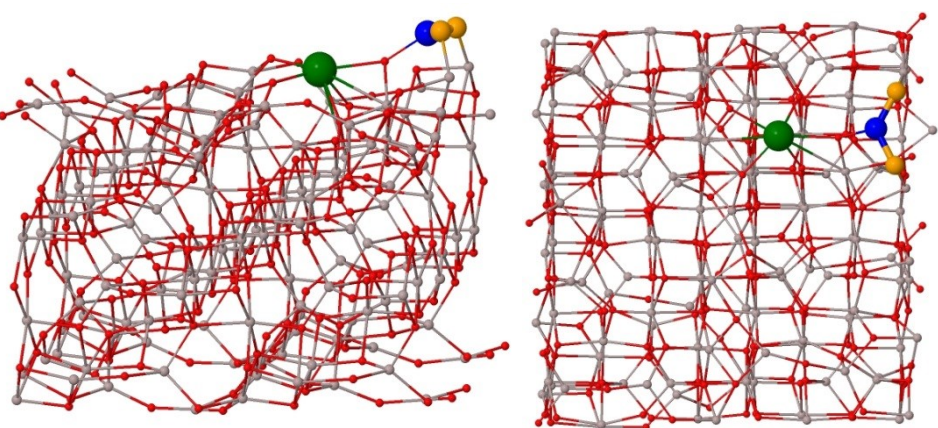



A-1e

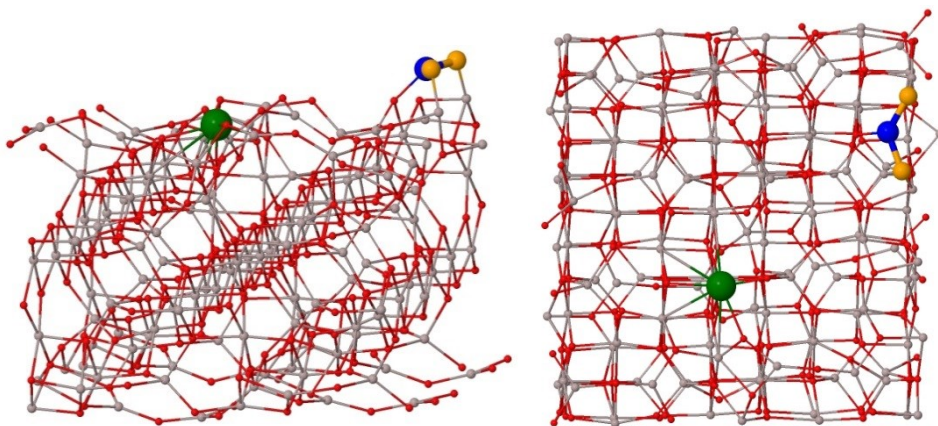

A-1f

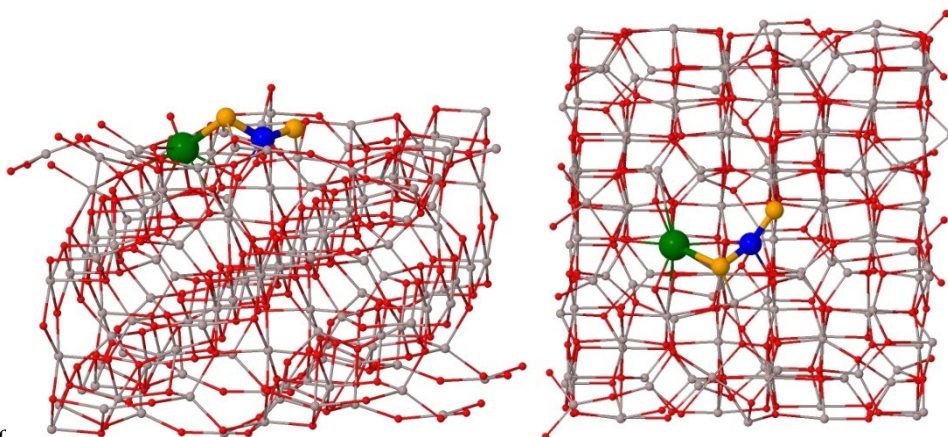

A-1g

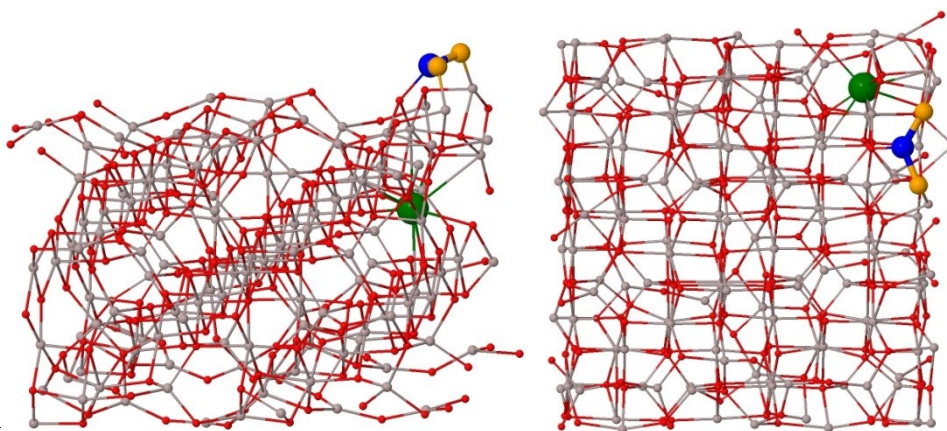

A-1h

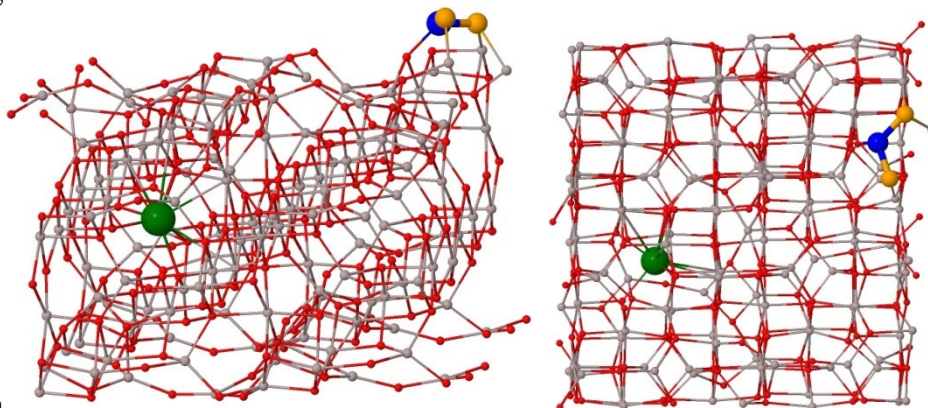



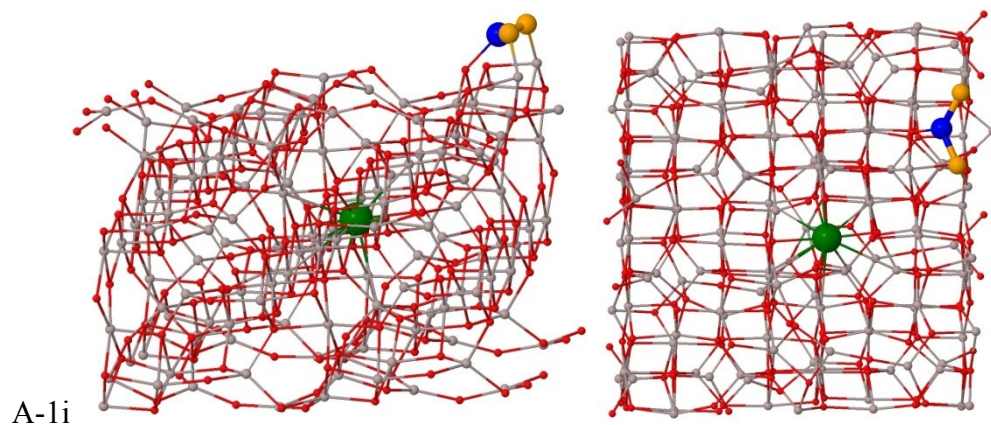

A-1i

**Figure S1.** Optimized models of stoichiometric one ceria unit on  $\gamma\text{-Al}_2\text{O}_3(100)$ : A-1a - one deposited unit; A-1b - one unit  $\text{CeO}_2$  in subsurface cavity A-1c - one unit  $\text{CeO}_2$  in internal cavity; A-1d-exchanged surface Al(3O); A-1e and A-1f - exchanged surface Al(5O); A-1g and A-1h - exchanged bulk Al(4O); A-1i – exchanged bulk Al(6O).

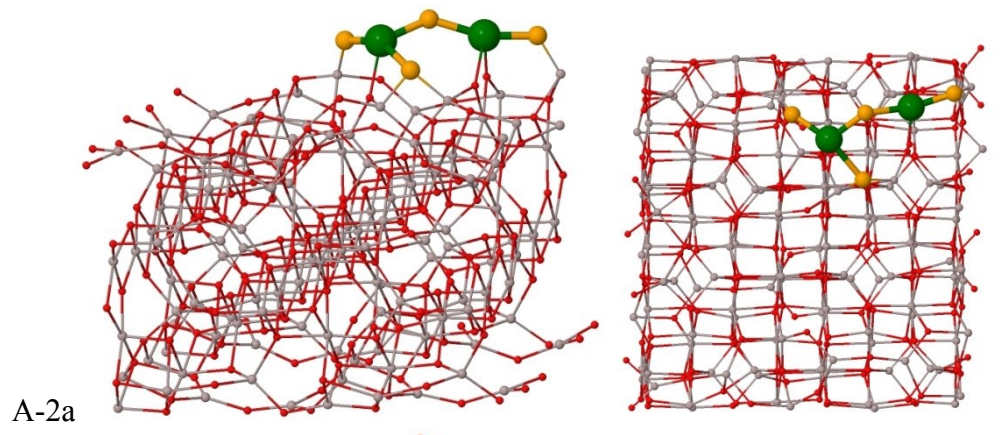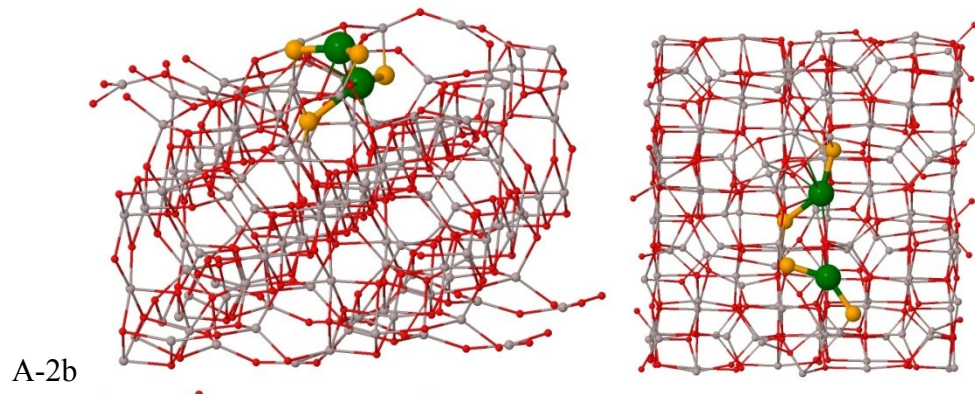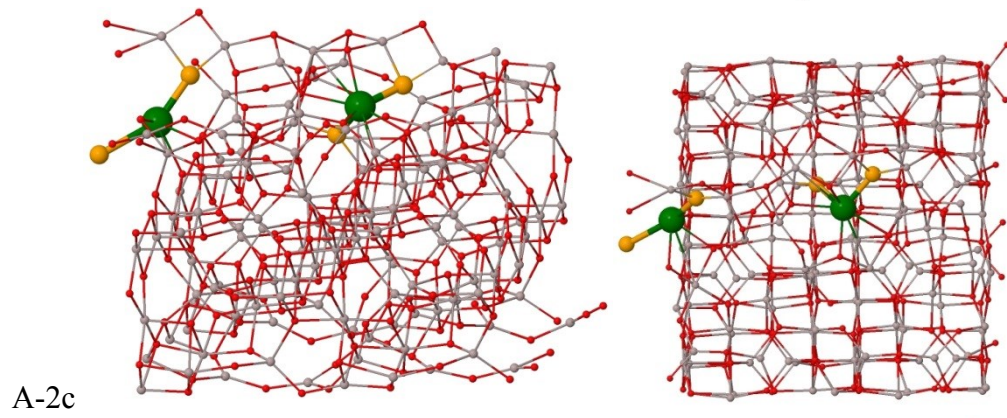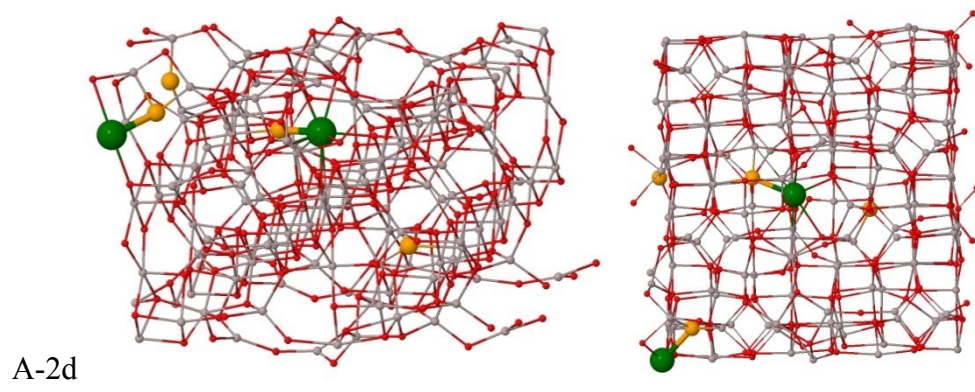



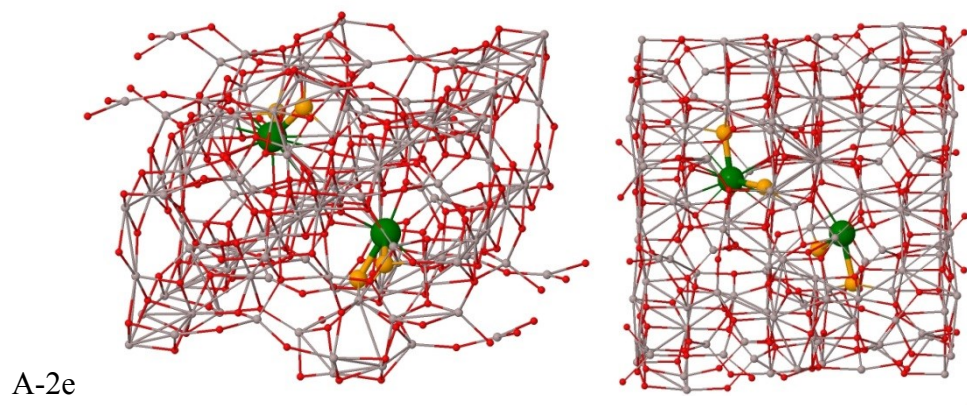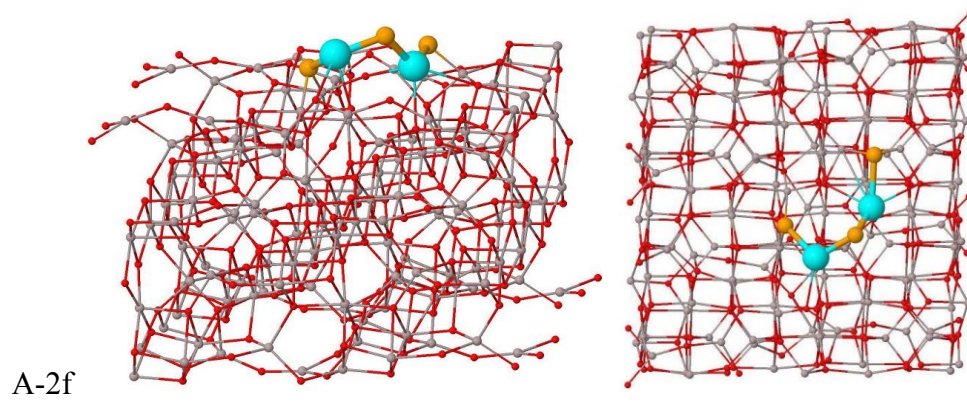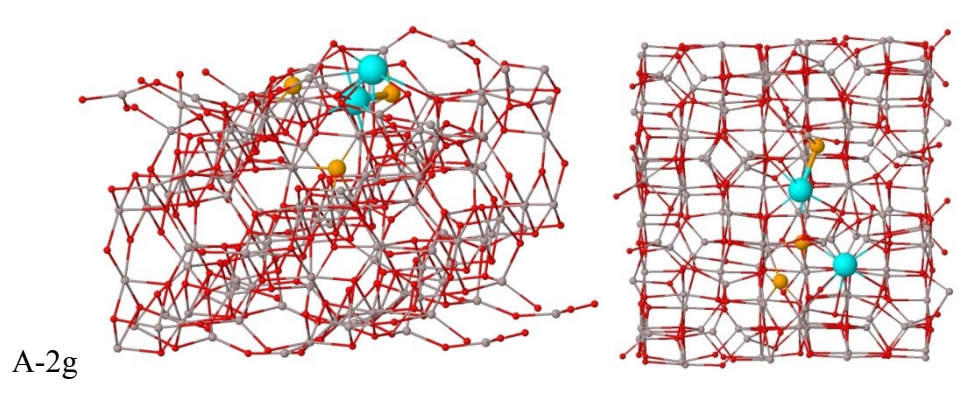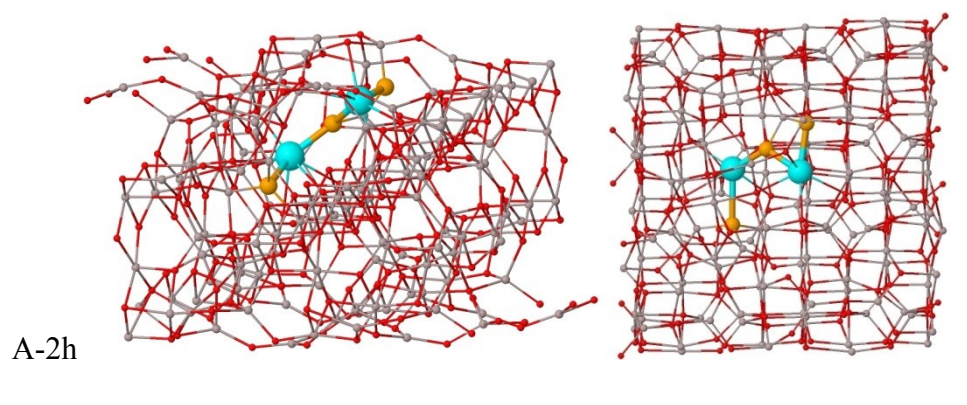



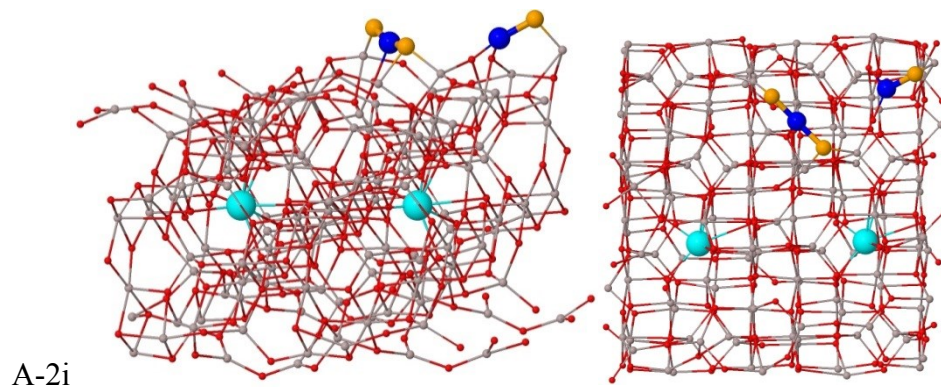

**Figure S2.** Optimized models of two  $\text{Ce}^{4+}$  or  $\text{Ce}^{3+}$  cations on  $\gamma\text{-Al}_2\text{O}_3(100)$ : A-2a-two deposited ceria units; A-2b - one deposited unit and one in subsurface cavity; A-2c - two units in identical subsurface cavities; A-2d one unit on subsurface, one in internal cavity; A-2e -  $2\text{CeO}_2$  in internal cavities; A-2f -deposited  $\text{Ce}_2\text{O}_3$  unit; A-2g-two  $\text{Ce}^{3+}$  cations in subsurface cavity; A-2h one  $\text{Ce}^{3+}$  in subsurface, one - in internal cavity; A-2i-exchange of  $2\text{Ce}^{3+}$  with internal  $2\text{Al}^{3+}$ .

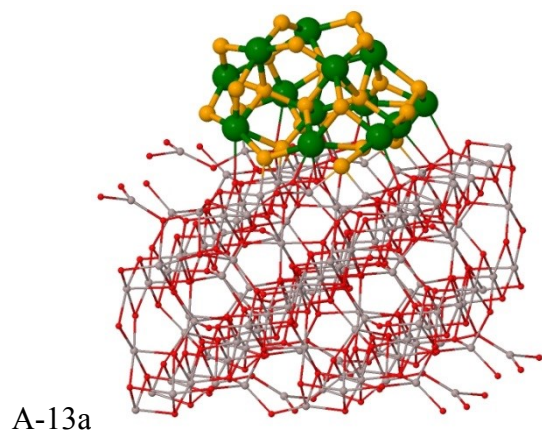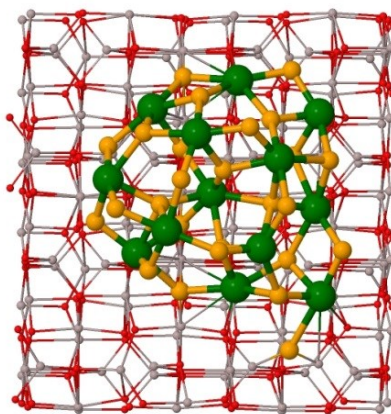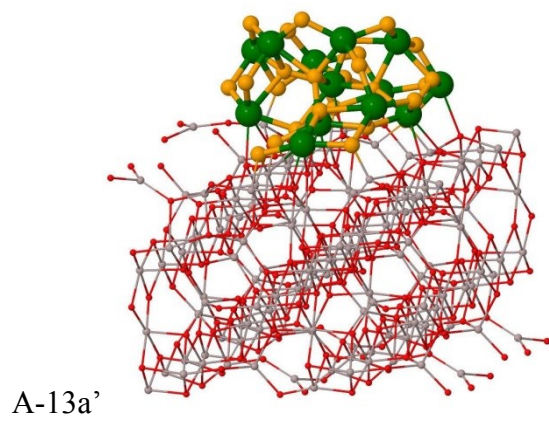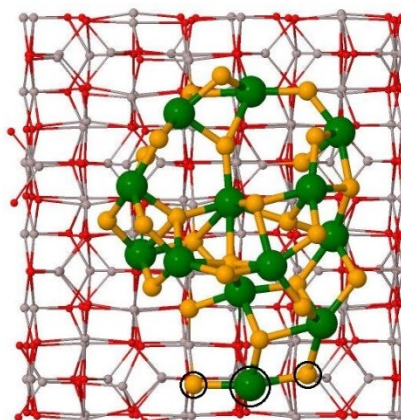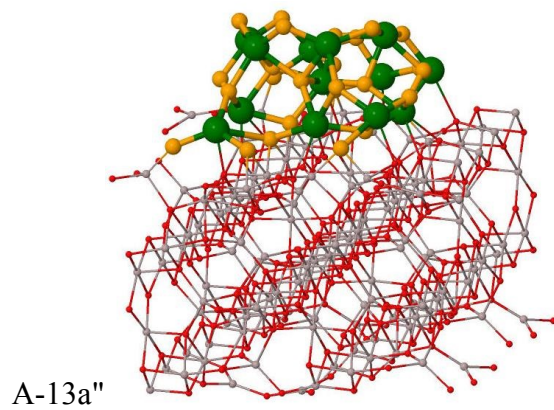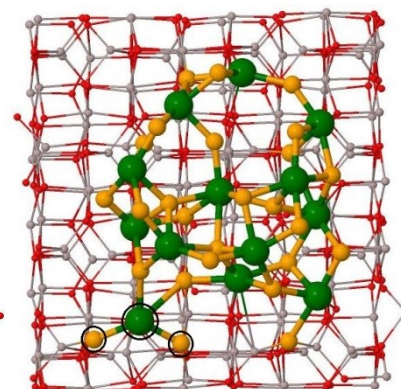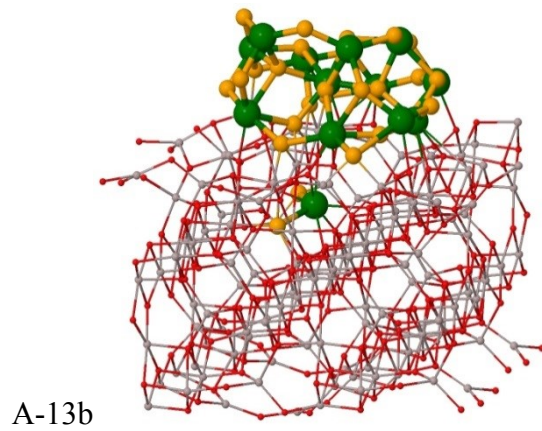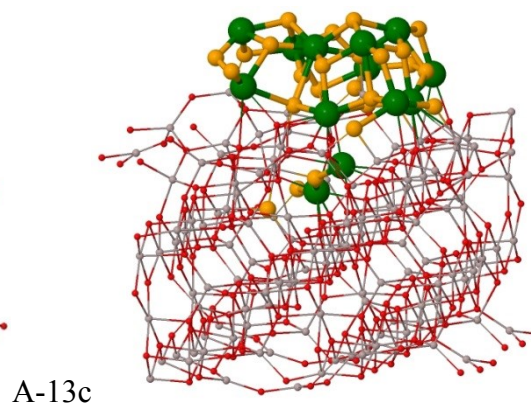



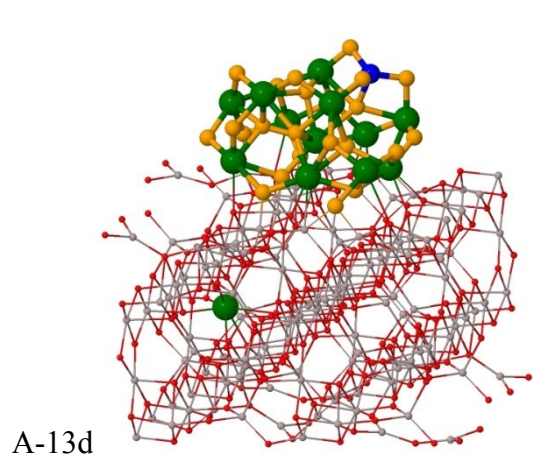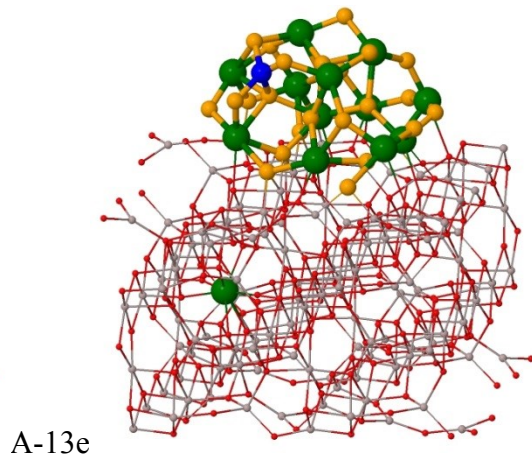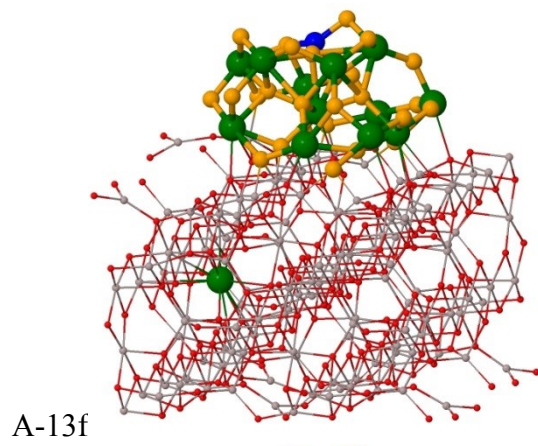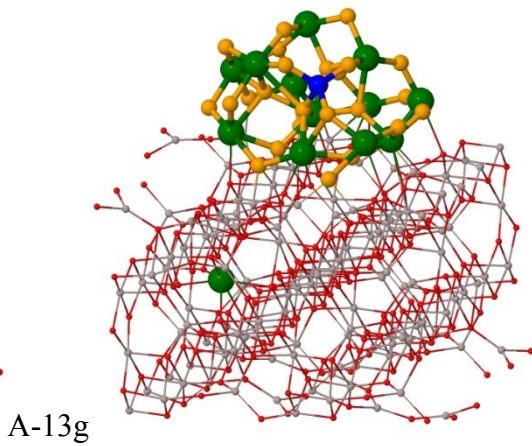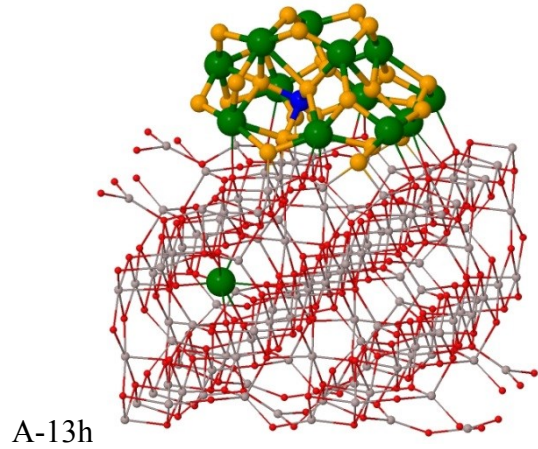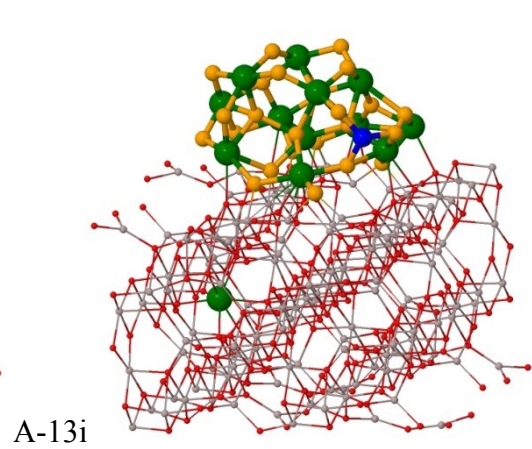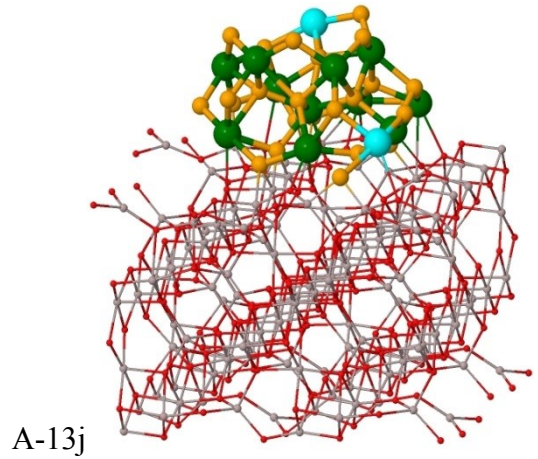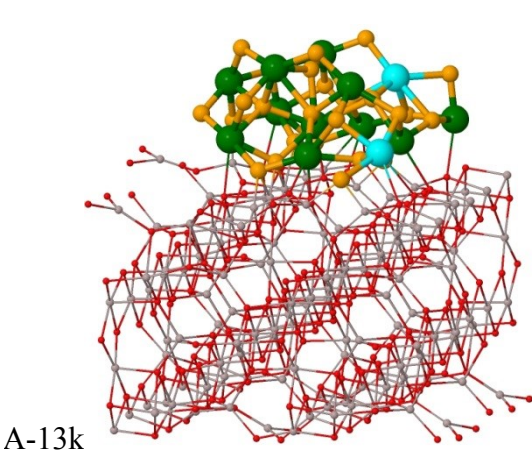



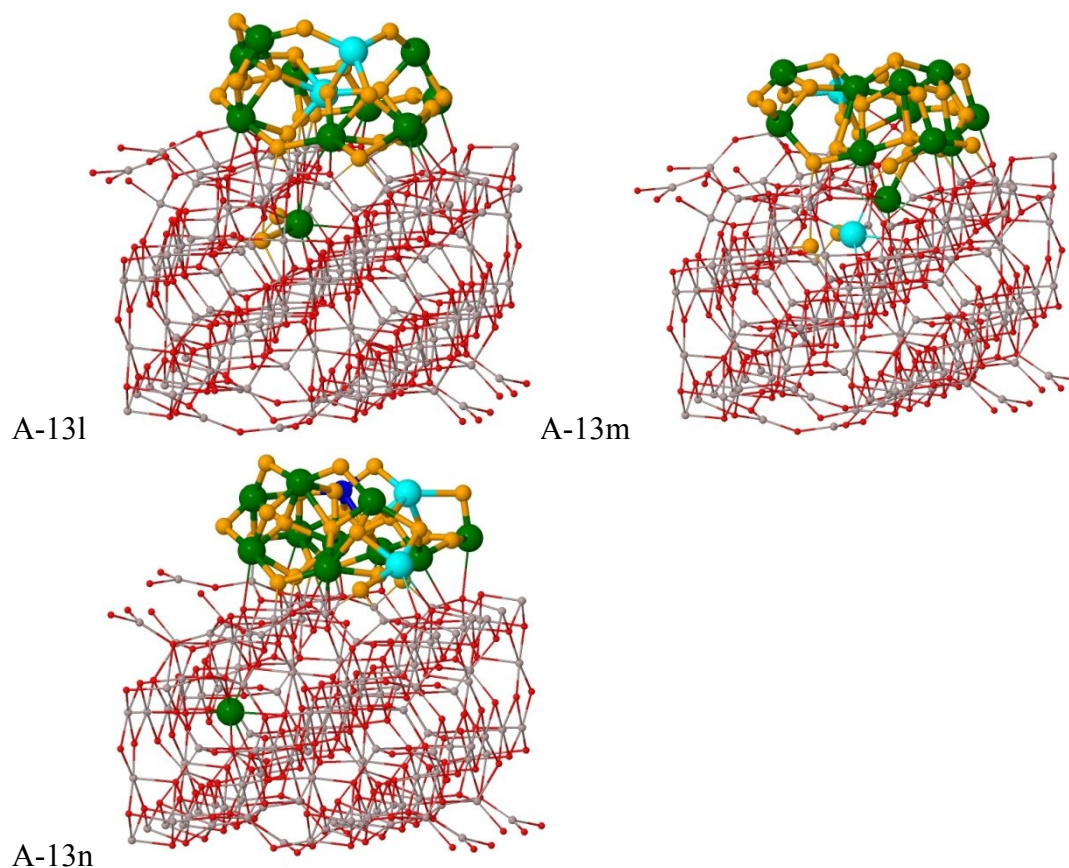

**Figure S3.** Optimized structures of stoichiometric or reduced ceria nanoparticle on  $\gamma$ - $\text{Al}_2\text{O}_3(100)$ : A-13a - deposited  $\text{Ce}_{13}\text{O}_{26}$  nanoparticle, A-13a' and A-13a'' - deposited  $\text{Ce}_{12}\text{O}_{24}$  nanoparticle and one  $\text{CeO}_2$  unit from the top layer deposited on the surface (the deposited  $\text{CeO}_2$  unit is marked with black circles in the top view panels); A-13b - deposited  $\text{Ce}_{12}\text{O}_{24}$  nanoparticle and one  $\text{CeO}_2$  unit in subsurface cavity; A-13c -  $\text{Ce}_{11}\text{O}_{22}$  deposited, two units  $\text{CeO}_2$  in subsurface cavities; A-13d - one of the top  $\text{Ce}^{4+}$  cations is exchanged with  $\text{Al}^{3+}$  from the bulk; A-13e-g - exchange of one  $\text{Ce}^{4+}$  from the top layer of the nanoparticle with bulk  $\text{Al}^{3+}$ ; A-13h-i exchange of one  $\text{Ce}^{4+}$  cation from the top layer of the nanoparticle with bulk  $\text{Al}^{3+}$ ; A-13j-k - deposited reduced  $\text{Ce}_{13}\text{O}_{25}$  nanoparticle; A-13l -  $\text{Ce}_{12}\text{O}_{23}$  deposited and one  $\text{CeO}_2$  unit in subsurface cavity; A-13m -  $\text{Ce}_{12}\text{O}_{23}$  deposited, one  $\text{Ce}^{3+}$  cation and one  $\text{CeO}_2$  unit in subsurface cavity; A-13n - deposited  $\text{Ce}_{13}\text{O}_{25}$  with exchange of one  $\text{Ce}^{4+}$  cation with bulk  $\text{Al}^{3+}$ .

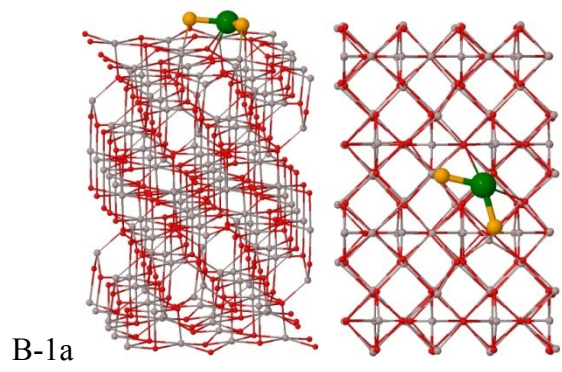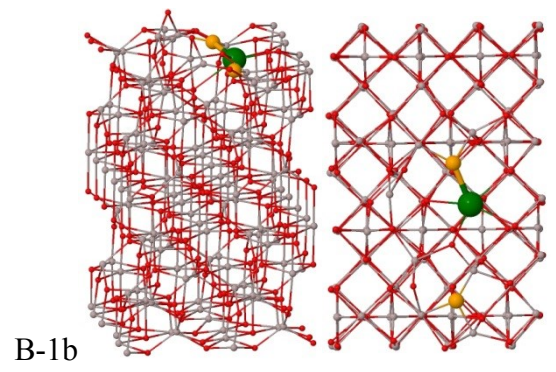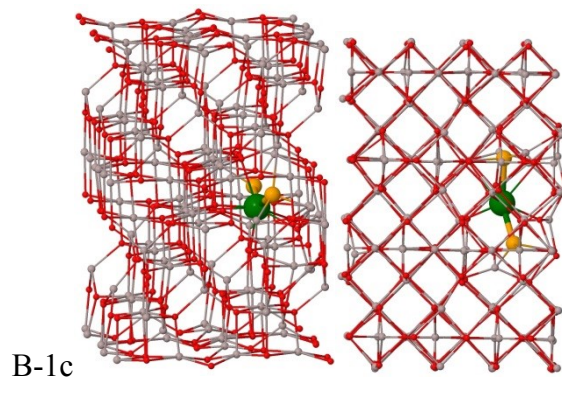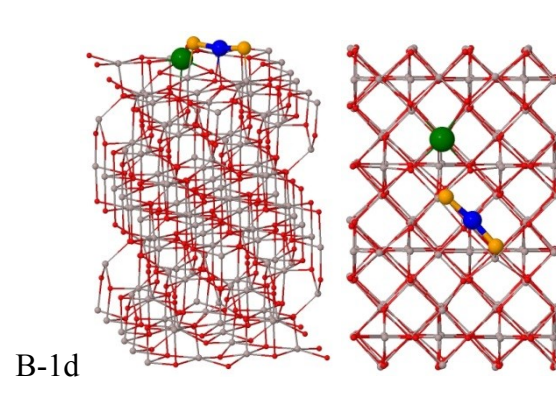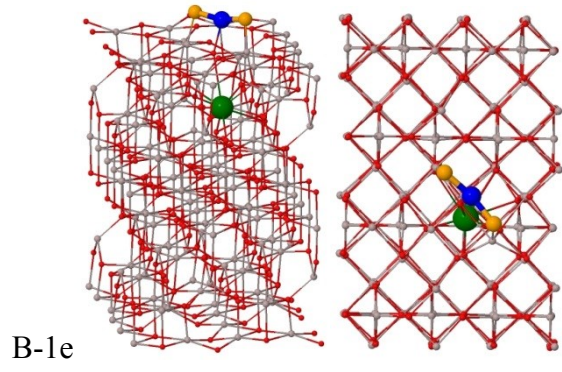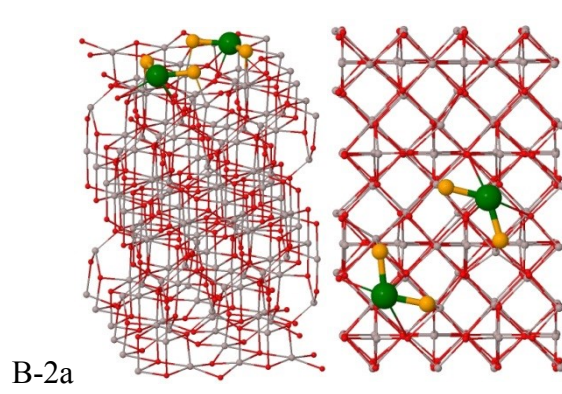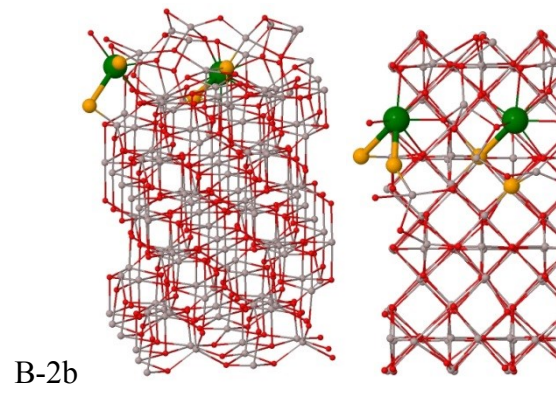



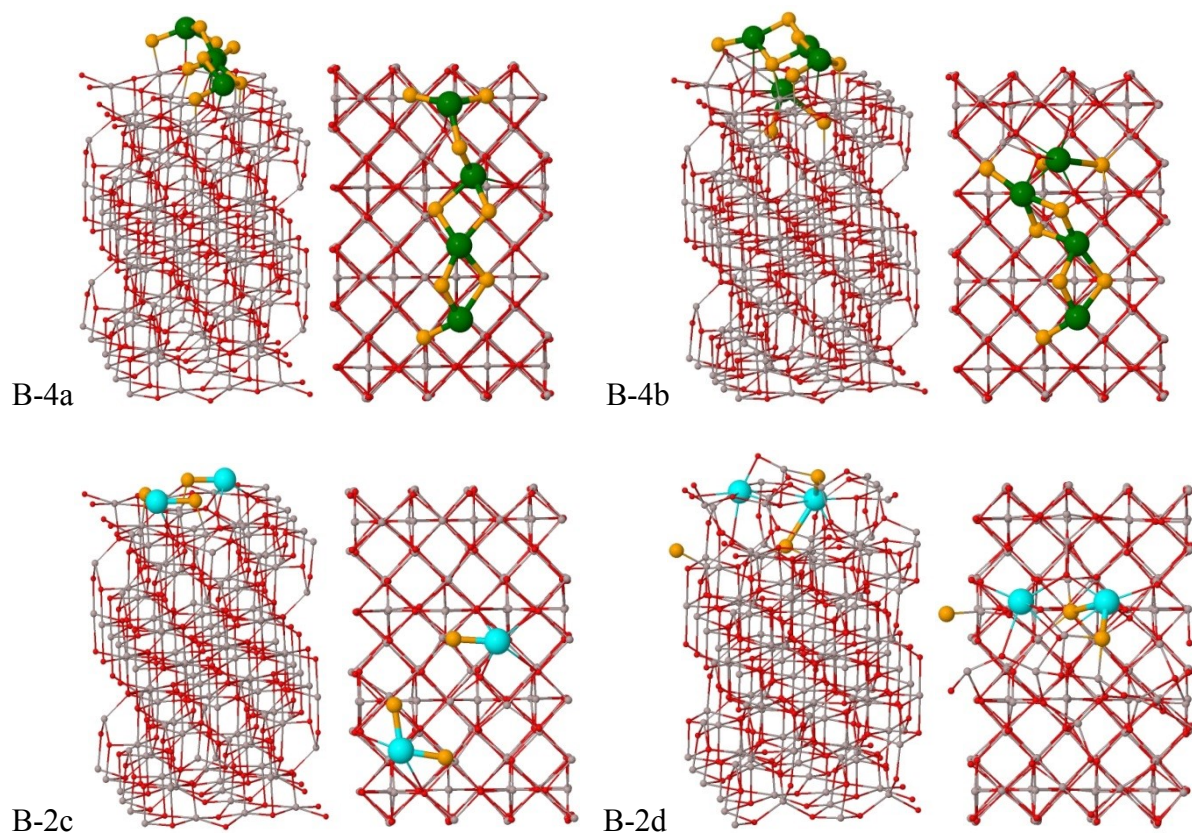

**Figure S4.** Optimized structures of stoichiometric or reduced  $\text{CeO}_2$  species on  $\gamma\text{-Al}_2\text{O}_3(001)$ : B-1a - deposited  $\text{CeO}_2$  unit; B-1b -  $\text{CeO}_2$  unit in subsurface cavity; B-1c -one  $\text{CeO}_2$  unit in internal cavity; B-1d - exchange of  $\text{Ce}^{4+}$  with surface  $\text{Al}^{3+}(5\text{O})$ ; B-1e - exchange of  $\text{Ce}^{4+}$  with internal  $\text{Al}^{3+}(4\text{O})$ ; B-2a - two deposited  $\text{CeO}_2$  units; B-2b - two  $\text{CeO}_2$  units in identical subsurface cavities; B-4a - four deposited  $\text{CeO}_2$  units; B-4b - three deposited  $\text{CeO}_2$  units and one in a subsurface cavity; B-2c - two deposited  $\text{Ce}^{3+}$  cations; B-2d - two  $\text{Ce}^{3+}$  cations in identical subsurface.



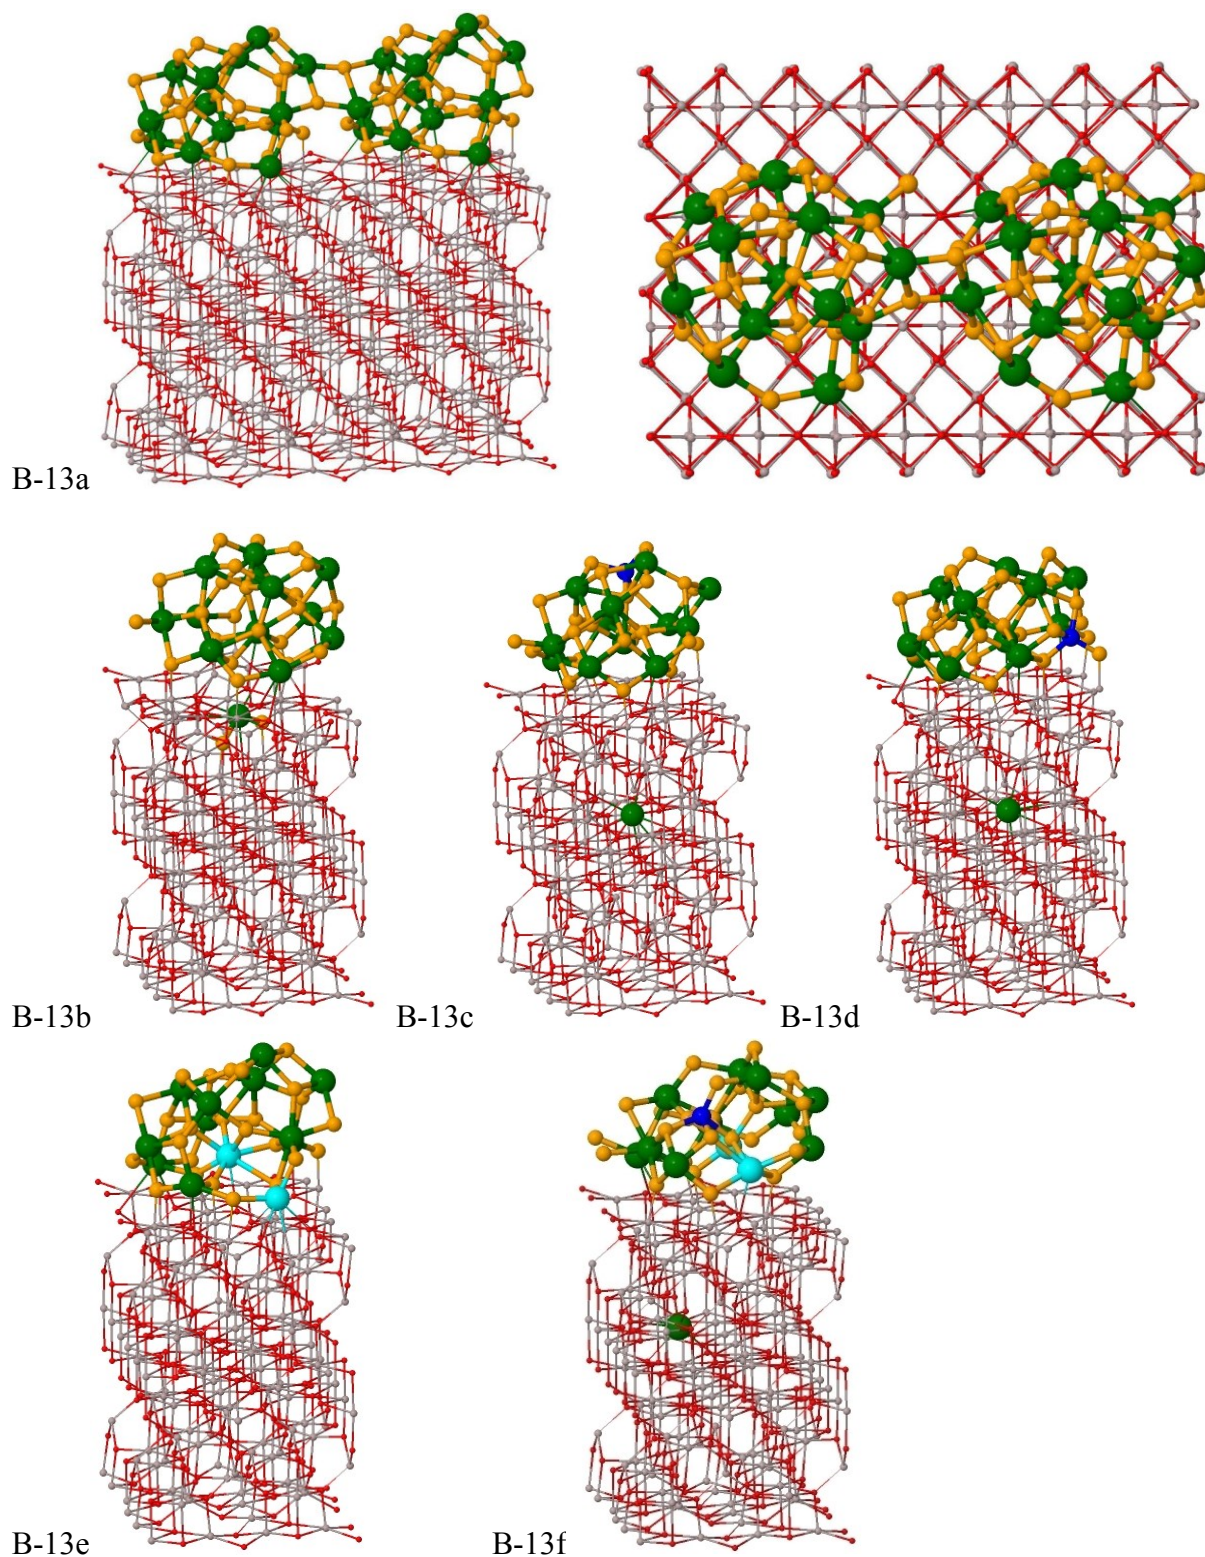

**Figure S5.** Optimized structures of stoichiometric or reduced ceria nanoparticle on  $\gamma$ - $\text{Al}_2\text{O}_3(001)$ : B-13a - deposited  $\text{Ce}_{13}\text{O}_{26}$  nanoparticle; B-13b - deposited  $\text{Ce}_{12}\text{O}_{24}$  nanoparticle and one  $\text{CeO}_2$  unit in subsurface cavity; B-13c - deposited  $\text{Ce}_{13}\text{O}_{26}$  nanoparticle with exchange of top  $1\text{Ce}^{4+}$  with internal  $\text{Al}^{3+}$ ; B-13d - deposited  $\text{Ce}_{13}\text{O}_{26}$  with exchange of bottom  $\text{Ce}^{4+}$  cation with internal  $\text{Al}^{3+}$ ; B-13e - deposited  $\text{Ce}_{13}\text{O}_{25}$  nanoparticle; B-13f - exchange of bulk  $\text{Al}^{3+}$  with  $\text{Ce}^{4+}$  cation from the top layer of the reduced nanoparticle.



A-1a

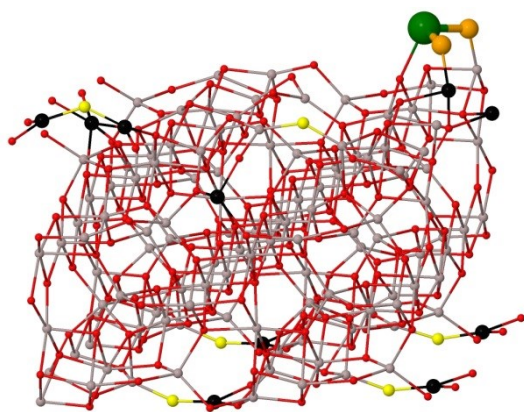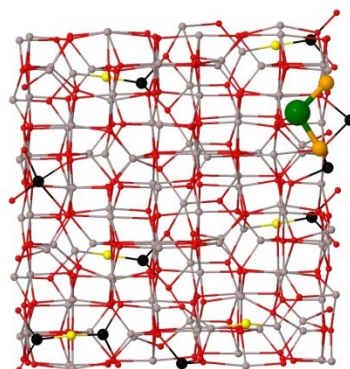

A-1b

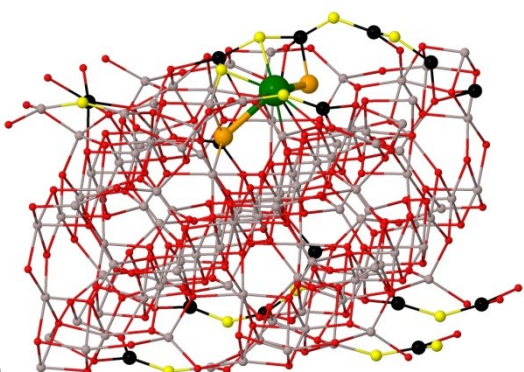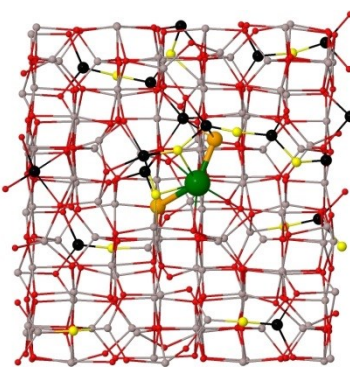

A-1c

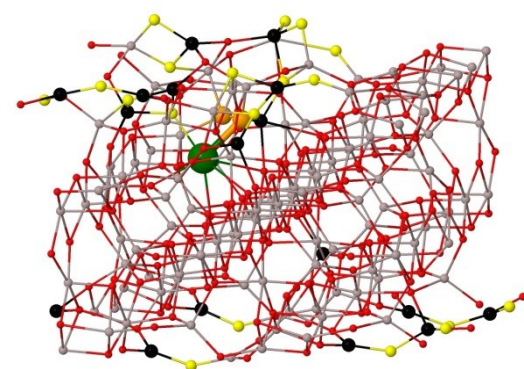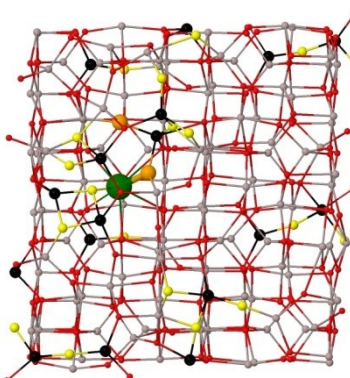

A-2a

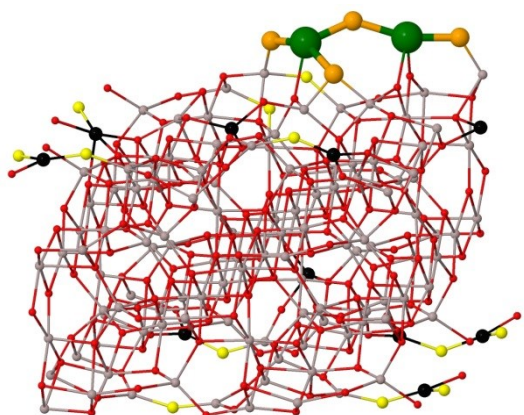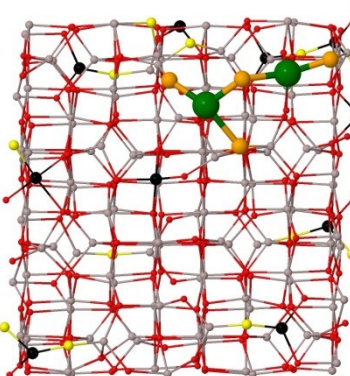



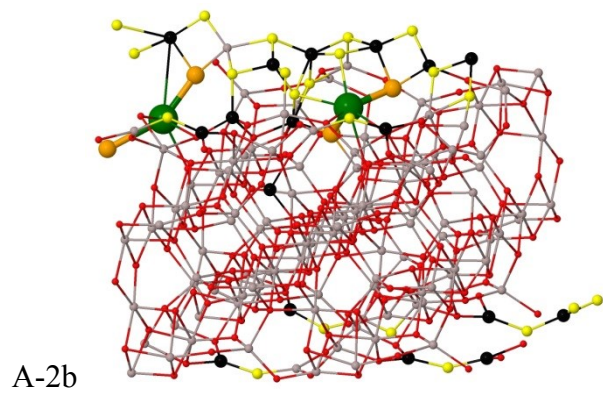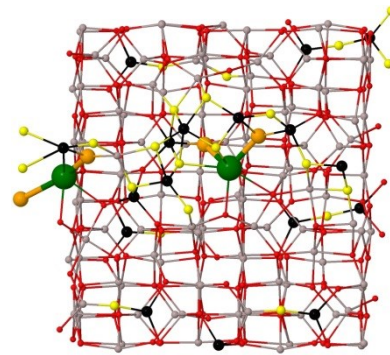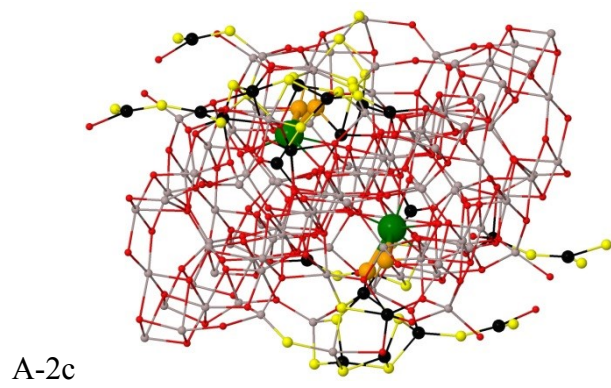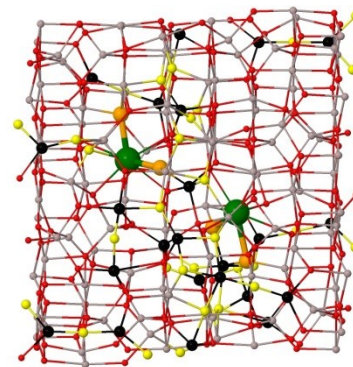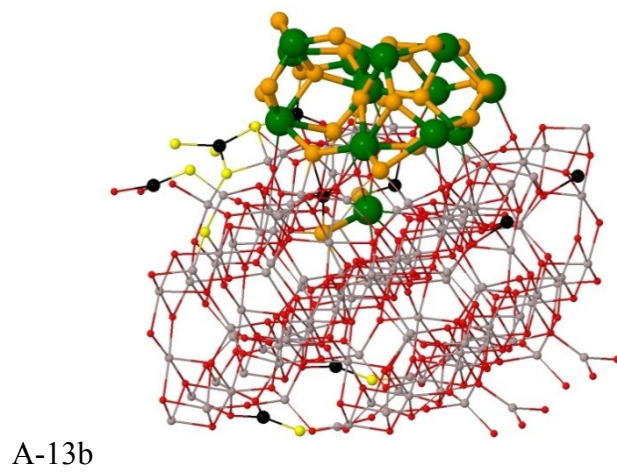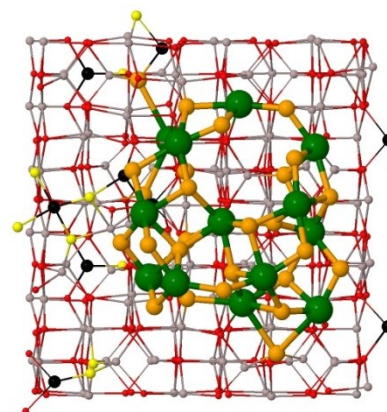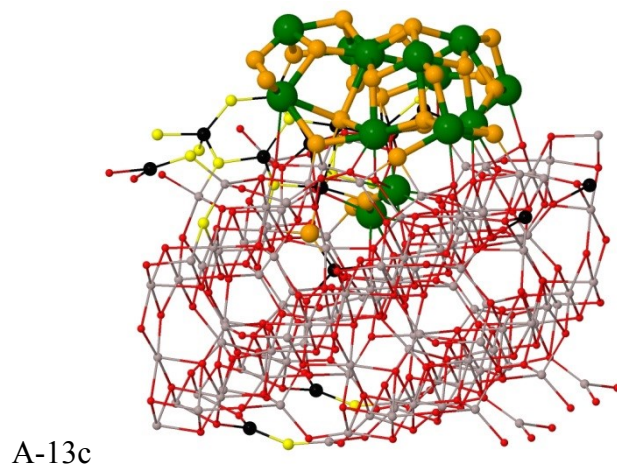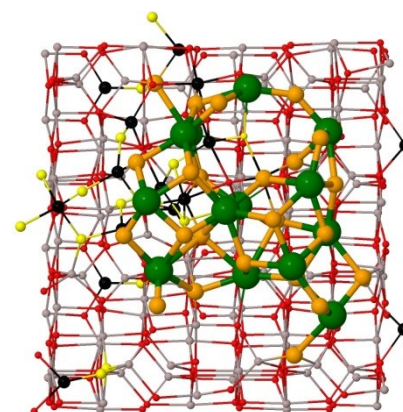



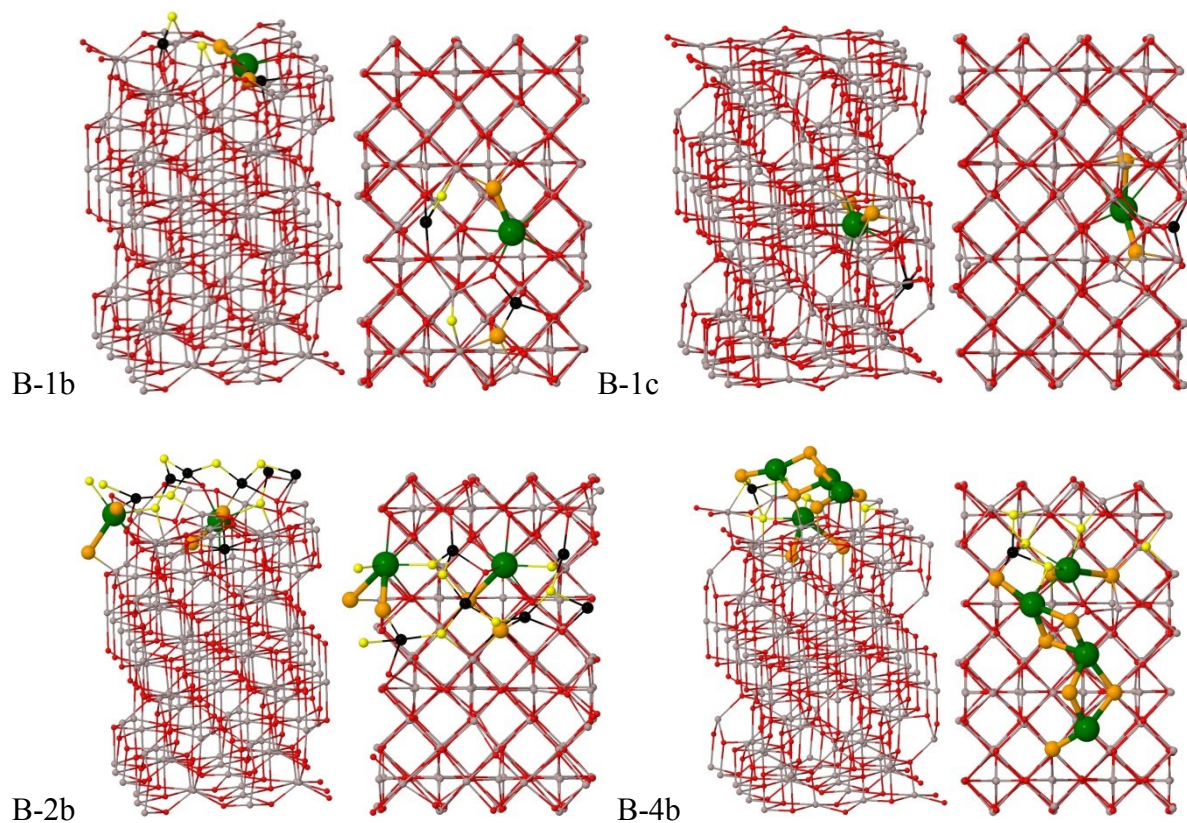

**Figure S6.** Representation of Al and O ions from the slab with large displacement - equal to or above 1.2 Å (colored in black and yellow, respectively) in some structures with deposited or incorporated stoichiometric ceria species : A-1a - one deposited unit; A-1b - one unit  $\text{CeO}_2$  in subsurface cavity A-1c - one unit  $\text{CeO}_2$  in internal cavity; A-2a-two deposited ceria units; A-2b - one deposited unit and one in subsurface cavity; A-2c - two units in identical subsurface cavities; A-13b - deposited  $\text{Ce}_{12}\text{O}_{24}$  nanoparticle and one  $\text{CeO}_2$  unit in subsurface cavity; A-13c -  $\text{Ce}_{11}\text{O}_{22}$  deposited, two units  $\text{CeO}_2$  in subsurface cavities; B-1b -  $\text{CeO}_2$  unit in subsurface cavity; B-1c -one  $\text{CeO}_2$  unit in internal cavity; B-2b - two  $\text{CeO}_2$  units in identical subsurface cavities; B-4b - three deposited  $\text{CeO}_2$  units and one in a subsurface cavity;

## Description of the approach for simulation of the relative concentrations of reduced and stoichiometric ceria nanoparticles on $\gamma$ -Al<sub>2</sub>O<sub>3</sub>(100) surface using enthalpy and entropy values obtained from computational results.

From the calculated energy values and pertinent vibrational frequencies we determined thermodynamic quantities for different models, which allowed us to analyze the possibilities for creation of O vacancy in the ceria nanoparticles deposited on the alumina surfaces depending on the temperature and oxygen pressure in the system. For this aim we considered the reaction:

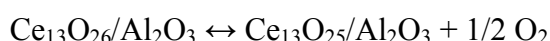

We define the relative Gibbs free energy of Ce<sub>13</sub>O<sub>26</sub>/Al<sub>2</sub>O<sub>3</sub> and Ce<sub>13</sub>O<sub>25</sub>/Al<sub>2</sub>O<sub>3</sub> systems,  $\Delta G(\text{Al}_2\text{O}_3/\text{Ce}_{13}\text{O}_{26-x})$ , x = 0 or 1:

$$\Delta G(\text{Al}_2\text{O}_3/\text{Ce}_{13}\text{O}_{26-x}) = \Delta H(\text{Al}_2\text{O}_3/\text{Ce}_{13}\text{O}_{26-x}) - T\Delta S(\text{Al}_2\text{O}_3/\text{Ce}_{13}\text{O}_{26-x}).$$

The enthalpy values,  $\Delta H(\text{Al}_2\text{O}_3/\text{Ce}_{13}\text{O}_{26-x})$ , were obtained from the total energy values corrected for the internal vibrational energy  $E_v$ <sup>1</sup> and zero-point vibrational energy (ZPE) derived from vibrational frequencies of the oxygen centers, which have been subsequently removed to form reduced structures:

$$H = E_{\text{el}} + E_v + \text{ZPE}.$$

In the calculation of the entropy values of the Al<sub>2</sub>O<sub>3</sub>/Ce<sub>13</sub>O<sub>26-x</sub> structures only the electronic ( $S_{\text{el}}$ ) and vibrational ( $S_v$ ) degrees of freedom were taken into account, since the O adsorbates are bound to the surface sufficiently strongly and the rotational and translational degrees of freedom are converted into vibrations.<sup>2,3</sup> Only for the O<sub>2</sub> molecule in the gas phase translational and rotational contributions  $E_{\text{tr}}$  and  $E_{\text{rot}}$  are added to the internal energy and entropy:

$$H(\text{O}_2) = E_{\text{el}} + E_v + E_{\text{tr}} + E_{\text{rot}} + \text{ZPE},$$

$$S(\text{O}_2) = S_{\text{el}} + S_v + S_{\text{tr}} + S_{\text{rot}}.$$

The expressions for all enthalpy and entropy contributions can be found elsewhere.<sup>1</sup>

- 
1. J. W. Ochterski, Thermochemistry in *Gaussian*, 2000, 1-19, [www.gaussian.com/g\\_whitepap/thermo.htm](http://www.gaussian.com/g_whitepap/thermo.htm)
  2. N. Hansen, T. Kerber, J. Sauer, A. T. Bell and F. J. Keil, *J. Am. Chem. Soc.*, 2010, **132**, 11525-11538.
  3. H. A. Aleksandrov and G. N. Vayssilov, *Catal. Today*, 2010, **152**, 78-87.



## Discussion on interatomic distances in the different structures

The number of oxygen centers surrounding the cerium ions and the corresponding average Ce-O distances in the modeled structures are shown Tables 1 to 4. In the structures with deposited one or two CeO<sub>2</sub> units on alumina (100) surface the coordination number of cerium cation is 3 and 4, respectively, with average Ce-O distance,  $\langle\text{Ce-O}\rangle$ , is in the 203 and 214-219 pm (Table 1). In the structures with incorporated Ce<sup>4+</sup> cations in cavities of alumina, the number of oxygen neighbors, N, increases to 7 or 8, which is accompanied by increase of the average Ce-O distance to 234-252 pm. In most of the structures with two reduced ceria cations, which are incorporated in the bulk of alumina or exchanged with aluminum ions, the number of oxygen neighbors is 7 and  $\langle\text{Ce-O}\rangle$  value is 245-250 pm.

The coordination number of the Ce<sup>4+</sup> cations from the nanoparticle on (100) surface, which are incorporated in the cavities or exchanged with Al<sup>3+</sup> from the bulk of the slab, is 7, while the average Ce-O distance varies between 233 and 238 pm (Table 2). The number of oxygen neighbors of the Ce<sup>3+</sup> cation incorporated in a cavity is 6 with average  $\langle\text{Ce-O}\rangle$  distance of 241 pm.

For the other surface, (001), the coordination number of deposited cerium cations in the structures with one and two units is 5 and the average  $\langle\text{Ce-O}\rangle$  distances are around 235 pm (Table 3), both higher than on the (100) surface. The number of oxygen neighbors of cerium cations in cavities is 6 or 8 and the  $\langle\text{Ce-O}\rangle$  values are in the range 235-241 pm.

The average distance of the incorporated ceria units from a ceria nanoparticle is 237 pm and the coordination number is six. Similar to the situation on (100) surface, the coordination of exchanged cerium cations in the structures with deposited nanoparticle on (001) surface is 7.
